# Supplementary material
Source: publisher figshare collection journal article supplement (https://wiley.figshare.com/articles/dataset/_/3518390)
Supplement: Supplementary file 1 [file 1 › appendix-A.htm]

Ecological Archives A023-033-A1


*Ecological Archives* A023-033-A1

John Parslow, Noel Cressie, Edward P. Campbell, Emlyn Jones, Lawrence Murray. 2013. Bayesian learning and predictability in a stochastic nonlinear dynamical model. *Ecological Applications* 23:679–698. http://dx.doi.org/10.1890/12-0312.1

Appendix A. Detailed information on the process model developed and used in this paper, including derivation of the prior distributions for the process model parameters.

> View / download PDF.


---

[Back to A023-033]
